# Supplementary material
Source: HighWire-hosted journal article supplement (https://hw-f5-jim.highwire.org/content/70/8/1728)
Supplement: inline-supplementary-material-1 [file inline-supplementary-material-1.pdf]

**Table S1.** Primers used for RT-qPCR.

| Gene        | Primers |                                  |
|-------------|---------|----------------------------------|
| <i>CD9</i>  | Forward | 5'- TCATGATGCTGGTGGGCTTC-3'      |
|             | Reverse | 5'- GGAATATCCCCAGATGGCCG-3'      |
| <i>CD36</i> | Forward | 5'- ATGTGCAAAATCCACAGGAAGTG-3'   |
|             | Reverse | 5'- GCCACAGCCAGATTGAGAAC-3'      |
| <i>CD68</i> | Forward | 5'- CTACATGGCGGTGGAGTACAA-3'     |
|             | Reverse | 5'- GAATGATGCTCGAGTTGCTGC-3'     |
| Beta-actin  | Forward | 5'- TGGCACCCAGCACAATGAA-3'       |
|             | Reverse | 5'- CTAAGTCATAGTCCGCCTAGAAGCA-3' |

**Table S2.** List of antibodies used for the flow cytometry assay.

| Antibody            | Isotype               | Conjugate                  | Clone    | Company             |
|---------------------|-----------------------|----------------------------|----------|---------------------|
| Anti-human CD9      | Mouse IgG1, $\kappa$  | PerCP-Cy <sup>TM</sup> 5.5 | M-L13    | BD Biosciences, USA |
| Negative control    | Mouse IgG1, $\kappa$  | PerCP-Cy <sup>TM</sup> 5.5 | MOPC 21  | BioLegend, USA      |
| Anti-human CD36     | Mouse IgM, $\kappa$   | FITC                       | CB38     | BD Biosciences, USA |
| Negative control    | Mouse IgM, $\kappa$   | FITC                       | G155-228 | BD Biosciences, USA |
| Anti-human CD68 Set | Mouse IgG2b, $\kappa$ | PE                         | Y1/82A   | BD Biosciences, USA |
| Negative control    | Mouse IgG2b, $\kappa$ | PE                         | 27-35    | BD Biosciences, USA |
| Anti-human CD14     | Mouse IgG2a, $\kappa$ | APC                        | M5E2     | BioLegend, USA      |
| Negative control    | Mouse IgG2a, $\kappa$ | APC                        | MOPC-173 | BioLegend, USA      |

**Table S3.** Comparison of drug usage frequencies between the three study groups.

| <b>Variables</b>                  | <b>CAD + OA<br/>(N = 30)</b> | <b>CAD<br/>(N = 30)</b> | <b>Ctrl<br/>(N = 17)</b> | <b>P-value</b> |
|-----------------------------------|------------------------------|-------------------------|--------------------------|----------------|
| <b>Aspirin (user)</b>             | 29 (96.66)                   | 25 (86.20)              | 9 (64.28)                | <b>0.015*</b>  |
| <b>Glyceryl trinitrate (user)</b> | 23 (76.66)                   | 24 (82.75)              | 5 (35.71)                | <b>0.006*</b>  |
| <b>Atorvastatin (user)</b>        | 25 (83.33)                   | 24 (82.75)              | 6 (42.85)                | <b>0.008*</b>  |
| <b>Clopidogrel (user)</b>         | 18 (60)                      | 22 (75.86)              | 4 (28.57)                | <b>0.012*</b>  |
| <b>Isosorbide (user)</b>          | 2 (6.66)                     | 0 (0)                   | 0 (0)                    | 0.229          |
| <b>Captopril (user)</b>           | 3 (10)                       | 3 (10.34)               | 0 (0)                    | 0.460          |
| <b>Valsartan (user)</b>           | 2 (6.66)                     | 2 (6.89)                | 1 (7.14)                 | 0.998          |
| <b>Losartan (user)</b>            | 4 (13.33)                    | 5 (17.24)               | 1 (7.14)                 | 0.664          |
| <b>Metoprolol (user)</b>          | 9 (30)                       | 15 (51.72)              | 5 (35.71)                | 0.209          |
| <b>Bisoprolol (user)</b>          | 2 (6.66)                     | 1 (3.44)                | 0 (0)                    | 0.568          |
| <b>Carvedilol (user)</b>          | 6 (20)                       | 4 (13.79)               | 0 (0)                    | 0.199          |
| <b>ARBs (user)</b>                | 6 (20)                       | 7 (23.33)               | 2 (11.76)                | 0.753          |
| <b>β-blockers (user)</b>          | 18 (60)                      | 20 (66.66)              | 5 (29.41)                | 0.115          |

CAD + OA: Coronary artery disease and opium addiction; CAD: Coronary artery disease; Ctrl: Control; ARBs: Angiotensin-II receptor blockers. Values are presented as numbers (%). The frequency of drug usage was compared between the three groups using the chi-square test.

\*Significant difference was set at  $P < 0.05$ .
